# Supplementary material for: Plasminogen Activator Inhibitor-1–Positive Platelet-Derived Extracellular Vesicles Predicts MACE and the Proinflammatory SMC Phenotype
Source: PubMed Central journal article supplement (PMC9626902; doi:10.1016/j.jacbts.2022.05.002), 2022-09-21
Supplement: mmc1.pdf [file mmc1.pdf]

## Supplemental Material

### **Plasminogen activator inhibitor-1 platelet extracellular vesicles predicts MACE and the pro-inflammatory SMC phenotype**

Richard G. Jung MD PhD,<sup>1,2,3</sup> Anne-Claire Duchez PhD,<sup>4</sup> Trevor Simard MD,<sup>1,2,3,5</sup> Shan Dhaliwal BSc,<sup>1,2,4,6</sup> Taylor Gillmore MSc,<sup>7</sup> Pietro Di Santo MD,<sup>1,2,4,6</sup> Alisha Labinaz BSc,<sup>1,2</sup> F. Daniel Ramirez MD MSc,<sup>1,2,5</sup> Adil Rasheed PhD,<sup>4</sup> Sabrina Robichaud BSc,<sup>4</sup> Mireille Ouimet PhD,<sup>4</sup> Spencer Short BSc BAsC,<sup>7</sup> Cole Clifford MD,<sup>7</sup> Fengxia Xiao PhD,<sup>8</sup> Marie Lordkipanidzé BPharm PhD,<sup>9,10</sup> Dylan Burger PhD,<sup>8</sup> Suresh Gadde PhD,<sup>4</sup> Katey J. Rayner PhD,<sup>4</sup> and Benjamin Hibbert MD PhD<sup>1,2,3,5</sup>

1. CAPITAL Research Group, University of Ottawa Heart Institute, Ottawa, Ontario, Canada
2. Vascular Biology and Experimental Medicine Laboratory, University of Ottawa Heart Institute, Ottawa, Ontario, Canada
3. Department of Cellular and Molecular Medicine, Faculty of Medicine, University of Ottawa, Ottawa, Ontario, Canada
4. Department of Biochemistry, Microbiology, and Immunology, Faculty of Medicine, University of Ottawa, Ottawa, Ontario, Canada
5. Division of Cardiology, University of Ottawa Heart Institute, Ottawa, Ontario, Canada
6. School of Epidemiology and Public Health, University of Ottawa, Ottawa, Ontario, Canada
7. Faculty of Medicine, University of Ottawa, Ottawa, Ontario, Canada
8. Kidney Research Centre, Department of Cellular and Molecular Medicine, Faculty of Medicine, University of Ottawa, Ontario, Canada
9. Faculté de Pharmacie, Université de Montréal, Montréal, Québec, Canada
10. Research Center, Montreal Heart Institute, Montréal, Québec, Canada

## **Supplemental Methods**

### ***Participant selection***

#### *Study population and sample collection*

The University of Ottawa Heart Institute is a regional tertiary center serving over 1.2 million people in the capital region of Canada and all coronary catheterization procedures are registered in the Cardiovascular And Percutaneous cInical TriALs (CAPITAL) Revascularization Registry.(1) The CAPITAL Revascularization Registry is a prospective registry capturing over 1200 clinical datapoints and has been previously described in detail elsewhere.(2) Concurrently, between October 2016 to August 2018, blood samples were collected on consecutively eligible patients referred for coronary revascularization immediately after the completion of the procedure and processed as previously described by our group.(2)

#### *Clinical outcomes*

Outpatient clinic or chart review was conducted at one-year following baseline blood draw to evaluate the endpoints of MACE and unplanned revascularization. The primary outcome was MACE, defined as a composite of all-cause mortality, myocardial infarction, unplanned revascularization, and cerebrovascular accident. Secondary outcomes were individual components of MACE. Clinical follow-up was conducted in-person and recorded in the CAPITAL Revascularization Registry. (2) Clinicians who performed the clinical follow-up were blinded to PAI-1<sup>+</sup> PEV levels.

### *Identification of discovery and validation cohort*

Participants in both the discovery and validation cohort in the study include  $\geq 18$  years of age referred to the University of Ottawa Heart Institute for coronary angiography and/or revascularization with conventional coronary angiography or CT angiography confirmed diagnosis of coronary artery disease. Exclusion criteria include unwillingness or inability to provide informed consent, anemia preventing blood draws, and when the blood sample was exhausted.

Between August 2015 to October 2018, 1851 patients who were referred for coronary angiography had their blood collected. Patients were excluded with incomplete clinical follow-up and missing data (n=726) and samples used in other studied (n=669). 456 patients had their PAI-1<sup>+</sup> PEV levels measured. The entire cohort was then equally split into a discovery or training data (n=228) and validation group (n=228) following simple random sampling of MACE events (n=76; 38 in each group) and non-MACE events (n=380; 190 in each group) using SAS v9.4.

### *Plasma PAI-1 assessment*

Human plasma spun at 3,200 or 20,000 x g at 4°C were measured in a 1:5 dilution using human PAI-1 enzyme-linked immunosorbent assay was purchased from Abcam (ab184863, Abcam, Cambridge, United Kingdom) as per manufacturer's recommendations by a researcher blinded to patient and procedural characteristics. PAI-1 activity (IU/mL) was evaluated as per manufacturer's recommendations using a chromogenic assay kit (ab108894, Abcam).

### *Electron microscopy*

PEVs ( $1.0 \times 10^7$  EVs/mL) were incubated for 4 hours in PBS containing 0.05% bovine serum albumin and anti-PAI-1 monoclonal antibody (1:200). Following primary antibody incubation, the sample was washed with PBS and incubated for 1 hour in goat anti-mouse IgG gold-linked polyclonal antibody (1:50, ab27421, Abcam). The sample was washed in PBS and loaded onto carbon-coated copper grids (300 mesh) for transmission electron microscopy (Tecnai™ G<sup>2</sup> Spirit TWIN, FEI Company, Hillsboro, USA).

### ***Human coronary artery smooth muscle cell assessment***

#### *Cell culture*

Human coronary artery smooth muscle cells (C0175C, ThermoScientific) were grown in Medium 231 (ThermoScientific) supplemented with penicillin-streptomycin and smooth muscle cell growth supplement (S00725), containing 4.9% v/v fetal bovine serum, 2 ng/mL human basic fibroblast growth factor, 0.5 ng/mL human epidermal growth factor, 5 ng/mL heparin, 0.01 ug/mL recombinant human insulin-like growth factor-I, and 0.2 ug/mL BSA at 37°C with 5.0% CO<sub>2</sub>.  $1.0 \times 10^8$  washed platelets/mL isolated from healthy volunteers were stimulated overnight with 1.0 μg/mL collagen (prepared from addition of 1 mg/mL collagen (P/N 385, Chronolog)) at room temperature in order to generate PEVs and quantified via flow cytometry. VSMCs were differentiated in differentiation supplement (S0085, ThermoScientific) for 72 hours in 6-wells and incubated with extracellular vesicles for 24 hours prior to extraction.

#### *Washed platelet preparation*

Whole blood was spun at 200 x g for 20 minutes with no brakes and the top layer was carefully transferred into a falcon tube, PGE<sub>1</sub> was added to a final concentration of 1 μM and was spun at 1,000 x g for 10 minutes with no brakes. Platelets were washed in washing buffer (103 mM NaCl, 5 mM KCl, 1 mM MgCl<sub>2</sub>, 5 mM glucose, 36 mM citric acid, 3.5 mg/mL BSA, and pH 6.5) and spun at 1,000 x g for 10 minutes. Finally, platelets were resuspended in Tyrode's buffer (5 mM HEPES, 137 mM NaCl, 2 mM KCl, 1 mM MgCl<sub>2</sub>, 12 mM NaHCO<sub>3</sub>, 0.3 mM NaH<sub>2</sub>PO<sub>4</sub>, 3.5 mg/mL BSA, and pH 7.4).

#### *Real-time gene expression analysis*

VSMCs were plated onto 6-well plates in Medium 231 and were subsequently treated with increasing concentrations of EVs (1.5-6.0x10<sup>4</sup> EVs/μL) and total RNA was extracted using TRIzol LS (10296010, ThermoScientific) at the indicated timepoints according to manufacturer's recommendations. Total RNA (750 ng) was used for reverse transcription using SuperScript™ IV VILO Master Mix (11766050, ThermoScientific) according the manufacturers' guidelines. Following reverse transcription, cDNA diluted 1:10 was used for real-time PCR analysis using SYBR Select Master Mix for CFX (4472942, ThermoScientific) according to manufacturer's guideline. Briefly, the real-time was run for 40 cycles at 95 °C denaturing for 15 seconds, 55°C annealing for 15 seconds, and 72°C extension for 1 minute using the Eppendorf RealPlex2 machine and quantified by the Pfaffl method.(3) Primers for *KLF4*, *KLF5*, smooth muscle cell actin (*ACTA2*), and *GAPDH* were previously described.(4)

#### *Cell proliferation and apoptosis*

VSMC proliferation was measured using the CellTrace Violet kit (C34557, ThermoScientific). VSMCs were stained in the presence of 5  $\mu$ M CellTrace Violet were seeded onto 96-well plates ( $5.0 \times 10^3$  VSMCs/mL) for 24 hours. They were then washed with PBS and incubated with increasing concentrations of PEVs ( $1.5-10.0 \times 10^4$  EVs/ $\mu$ L) and/or tiplaxtinin (SigmaAldrich) for 24 and 48 hours at 37°C and 5.0% CO<sub>2</sub>. Proliferation and apoptosis (Annexin V-FITC kit, 130-092-052, Miltenyi Biotec) was quantified according to manufacturer's recommendations using the MACSQuant Analyzer 10.

#### *Scratch assay*

VSMCs were plated onto 96-well plates ( $2 \times 10^4$  cells/mL) in Medium 231 and incubated at 37°C and 5.0% CO<sub>2</sub> until confluence was achieved. VSMCs were then labelled with CellMask Orange (C10045, ThermoScientific) and washed with PBS. Cells were scratched using a p200 tip in a vertical direction, washed with PBS, and treatments suspended in Medium 231 were added to the 96-well plates and imaged every 2 hours using the Cytation 5 (BioTek, Winooski, Vermont, USA). Wound closure percentage was quantified on the Cytation Gen5 software using manufacturer recommendations.

#### *Extracellular vesicle analysis*

##### *Flow cytometry*

For isolation of EVs, plasma was first spun at 20,000 x g for 20 minutes. Then the sample was resuspended in Annexin V buffer and incubated with Annexin V-PE (130-118-363, Miltenyi Biotec), spun at 20,000 g for 20 minutes, and incubated with appropriate antibodies (1:20 CD41a-VioBlue (130-105-558) and 1:7.5 PAI-1-FITC (11501-05041, AssayPro) or IgG-FITC for 1 hour.

Samples were spun at 20,000 g for 20 minutes and resuspended in phosphate-buffered saline (PBS), with 1:300,000 1.00  $\mu\text{m}$  Fluoresbrite YG Microspheres (17154-10, Polysciences Inc). Data on 10,000 YG microsphere events were acquired using the MACSQuant 10 flow cytometer (Miltenyi Biotec). PAI-1<sup>+</sup> PEV (defined as Annexin V<sup>+</sup>/CD41<sup>+</sup>/PAI-1<sup>+</sup>) quantification was conducted using FlowJo v10 (Ashland, Oregon, USA).

### ***Thrombus formation using the Total Thrombus Analysis System***

Thrombus formation was analyzed using a validated automatic microchip-based flow chamber system Total Thrombus Analysis System (T-TAS, Zacros, Fujimori Kogyo Company, Japan), using the AR chip.(5-8) Whole blood was incubated with increasing concentrations of EVs isolated from volunteers for 5 minutes prior to T-TAS analysis. For comparative analysis between ISR and control EV, plasma from ISR and control patients were spun at 20,000g for 90 minutes and a final concentration of  $3.5 \times 10^4$  EVs/uL was added to volunteer whole blood prior to analysis on T-TAS. Differences in thrombus formation was quantified at four points: 1) time to thrombus onset measured at 10 kPa (T<sub>10</sub>), 2) time to occlusive thrombus measured at 80 kPa (T<sub>80</sub>), 3) the rate of thrombus formation measured as a difference of T<sub>80</sub> and T<sub>10</sub>, and 4) total thrombogenicity quantified as area under the pressure vs. time curve.

### ***Human coronary artery smooth muscle cell assessment***

#### ***Platelet extracellular vesicle interaction with human coronary VSMCs***

Platelets ( $1.0 \times 10^8/\text{mL}$ ) were labelled with 10 $\mu\text{M}$  CellTracker Green CMFDA Dye (C2925, ThermoScientific) in Tyrode's Buffer for 20 minutes and spun at 1000 x g for 10 minutes without brakes. CMFDA<sup>+</sup> platelets were resuspended in Tyrode's Buffer and stimulated with 1.0  $\mu\text{g}/\text{mL}$  collagen overnight to generated CMFDA<sup>+</sup> platelet EVs and quantified by flow cytometry.

Subsequently,  $1 \times 10^8$  platelet EVs/mL were incubated with tiplaxtinin or TM5275 for 30 minutes at room temperature. Subsequently, they were co-incubated with human coronary VSMCs for 40 minutes at room temperature as previously described by another group.(9) Free platelet EVs were removed following centrifugation at 1400 rpm and washed with PBS. Control incubation was done by co-incubating PEVs with VSMCs in both vehicle control or in the presence of EDTA. CMFDA<sup>+</sup> EV interaction with VSMC was quantified by median VSMC FITC intensity by flow cytometry.

#### *Internalization of platelet extracellular vesicles into smooth muscle cells*

Washed platelets ( $1.0 \times 10^8$  /mL) extracted from healthy volunteers was stained with CFSE for 20 minutes in Tyrode's buffer and spun at 3,200 x g for 20 minutes. Labelled platelets were subsequently stimulated with 1.0  $\mu$ g/mL collagen overnight and platelets EVs were quantified using Annexin V and CD41. CellMask Orange labelled VSMCs plated on glass slips were co-incubated with CellTracker Green<sup>+</sup> EVs for 8, 12, and 24 hours and fixed with 4% paraformaldehyde and labelled with Hoescht staining dye. Three-dimensional images were acquired using the Zeiss Elyra LSM880 and analyzed using the Zen lite 3.1 and ImageJ.



**Supplemental Table 1.** List of primers used for real-time analysis

| <b>Target Gene</b> | <b>Sequence</b>                    |
|--------------------|------------------------------------|
| KLF4 FWD           | CCCACATGAAGCGACTTCCC               |
| KLF4 REV           | CAG GTC CAG GAG ATC GTT GAA        |
| KLF5 FWD           | TCA GTC GTA GAC CAG TTC TTC A      |
| KLF5 REV           | CTG GGA TTT GTA GAG GCC AGT        |
| GAPDH FWD          | CAT GAG AAG TAT GAC AAC AGC<br>CT  |
| GAPDH REV          | AGT CCT TCC ACG ATA CCA AAG T      |
| ACTA2 FWD          | GTG TTG CCC CTG AAG AGC AT         |
| ACTA2 REV          | GCT GGG ACA TTG AAA GTC TCA        |
| MMP-2 FWD          | CAG GGA ATG AGT ACT GGG TCT<br>ATT |
| MMP-2 REV          | ACT CCA GTT AAA GGC AGC ATC<br>TAC |
| Osteocalcin FWD    | CGC TAC CTG TAT CAA TGG CTG G      |
| Osteocalcin REV    | CTC CTG AAA GCC GAT GTG GTC A      |
| BMP-2 FWD          | TGT ATC GCA GGC ACT CAG GTC A      |
| BMP-2 REV          | CCA CTC GTT TCT GGT AGT TCT TC     |
| CCL2 FWD           | AGA ATC ACC AGC AGC AAG TGT<br>CC  |
| CCL2 REV           | TCC TGA ACC CAC TTC TGC TTG G      |

**Supplemental Table 2.** List of materials used for the study

| <b>Material</b>                                     | <b>Company</b>    | <b>Catalogue Number</b> |
|-----------------------------------------------------|-------------------|-------------------------|
| Prostaglandin E1                                    | Sigma-Aldrich     | P5515                   |
| PAI-1 ELISA                                         | Abcam             | ab184863                |
| PAI-1 activity kit                                  | Abcam             | ab108894                |
| PAI-1 monoclonal antibody (1D5)                     | Invitrogen        | MA517171                |
| Goat anti-mouse IgG gold-linked polyclonal antibody | Abcam             | ab27421                 |
| Human coronary artery smooth muscle cells           | ThermoScientific  | C0175C                  |
| Medium 231                                          | ThermoScientific  | M231500                 |
| Smooth muscle cell growth supplement                | ThermoScientific  | S00725                  |
| Smooth muscle cell differentiation supplement       | ThermoScientific  | S0085                   |
| Penicillin-Streptomycin (10000 U/mL)                | Gibco             | 15140122                |
| Collagen                                            | Chrono-Log        | P/N 385                 |
| TRIzol LS                                           | ThermoScientific  | 10296010                |
| SuperScript IV VILO Master Mix                      | ThermoScientific  | 11766050                |
| CellTrace Violet                                    | ThermoScientific  | C34557                  |
| Tiplaxtinin                                         | Sigma-Aldrich     | PZ0295                  |
| TM5275                                              | Sigma-Aldrich     | SML1398                 |
| Annexin V-FITC                                      | Miltenyi Biotec   | 130-118-363             |
| SYBR Select Master Mix for CFX                      | ThermoScientific  | 4472942                 |
| CellMask Orange                                     | ThermoScientific  | C10045                  |
| CD41a-VioBlue                                       | Miltenyi Biotec   | 130-105-558             |
| PAI-1 FITC                                          | AssayPro          | 11501-05041             |
| 1.0 um Fluoresbrite YG Microsphere                  | Polysciences Inc. | 17154-10                |
| AR Chip for T-TAS                                   | Fujimori Kogyo    | 19001                   |
| CaCTI reagent for T-TAS                             | Fujimori Kogyo    | 19004                   |
| PL Chip for T-TAS                                   | Fujimori Kogyo    | 18002                   |
| CellTracker Green CMFDA Dye                         | ThermoScientific  | C2925                   |

**Supplemental Table 3. Differences in baseline characteristics by major adverse cardiac events**

|                                                     | No<br>MACE<br>(n=380)    | MACE<br>(n=76)            | P-<br>valu<br>e |
|-----------------------------------------------------|--------------------------|---------------------------|-----------------|
| <i>PAI-1<sup>+</sup> PEV (/uL) – median (Q1-Q3)</i> | 8345<br>[3777-<br>33500] | 13787<br>[6712-<br>26942] | 0.047           |
| <i>Age - mean (SD)</i>                              | 65.5<br>(11.1)           | 72.5<br>(10.9)            | <0.0<br>001     |
| <i>Sex (female) - no. (%)</i>                       | 100<br>(26.3)            | 24 (31.6)                 | 0.35            |
| <i>Hypertension - no. (%)</i>                       | 250<br>(65.8)            | 52 (68.4)                 | 0.66            |
| <i>Dyslipidemia - no. (%)</i>                       | 221<br>(58.2)            | 56 (73.7)                 | 0.01<br>1       |
| <i>Diabetes - no. (%)</i>                           | 112<br>(29.9)            | 35 (46.1)                 | 0.00<br>6       |
| <i>Smoking - no. (%)</i>                            |                          |                           | 0.37            |
| <i>Never</i>                                        | 226<br>(59.5)            | 39 (51.3)                 |                 |
| <i>Remote (quit &gt;1 month ago)</i>                | 89<br>(23.4)             | 23 (30.3)                 |                 |
| <i>Active</i>                                       | 65<br>(17.1)             | 14 (18.4)                 |                 |
| <i>Family history of CAD - no. (%)</i>              | 55<br>(14.5)             | 10 (13.2)                 | 0.76            |
| <i>Atrial fibrillation - no. (%)</i>                | 37 (9.7)                 | 11 (14.5)                 | 0.22            |
| <i>Indications for angiography - no. (%)</i>        |                          |                           |                 |
| <i>Acute coronary syndrome</i>                      | 165<br>(43.4)            | 38 (50.0)                 | 0.29            |
| <i>Staged percutaneous coronary intervention</i>    | 32 (8.4)                 | 10 (13.2)                 | 0.19            |
| <i>Stable coronary artery disease</i>               | 144<br>(37.9)            | 21 (27.6)                 | 0.08<br>9       |
| <i>Shock</i>                                        | 1 (0.3)                  | 0 (0.0)                   | 0.65            |
| <i>Previous history - no. (%)</i>                   |                          |                           |                 |
| <i>Percutaneous coronary intervention</i>           | 96<br>(25.3)             | 22 (29.0)                 | 0.50            |
| <i>Myocardial infarction</i>                        | 63<br>(16.6)             | 22 (29.0)                 | 0.01<br>2       |
| <i>Coronary artery bypass grafting</i>              | 14 (3.7)                 | 9 (11.8)                  | 0.00<br>3       |
| <i>Peripheral artery disease</i>                    | 25 (6.6)                 | 11 (14.5)                 | 0.02<br>0       |
| <i>Cerebrovascular accident</i>                     | 19 (5.0)                 | 9 (10.5)                  | 0.06<br>2       |

|                                                                                  |          |           |      |
|----------------------------------------------------------------------------------|----------|-----------|------|
| <i>Bleed</i>                                                                     | 7 (1.8)  | 1 (1.3)   | 0.75 |
| <i>Heart failure</i>                                                             | 19 (5.0) | 4 (5.3)   | 0.92 |
| <b>Medications - no. (%)</b>                                                     |          |           |      |
|                                                                                  | 346      |           |      |
| <i>Aspirin</i>                                                                   | (91.1)   | 69 (90.8) | 0.94 |
|                                                                                  | 343      |           |      |
| <i>P2Y12 inhibitor</i>                                                           | (90.3)   | 67 (88.2) | 0.58 |
|                                                                                  | 199      |           |      |
| <i>ACEi/ARB</i>                                                                  | (52.4)   | 39 (51.3) | 0.87 |
|                                                                                  | 223      |           |      |
| <i>Beta blocker</i>                                                              | (58.7)   | 45 (59.2) | 0.93 |
|                                                                                  | 48       |           |      |
| <i>Calcium channel blocker</i>                                                   | (12.6)   | 15 (19.7) | 0.10 |
|                                                                                  | 307      |           |      |
| <i>Statin</i>                                                                    | (80.8)   | 54 (85.5) | 0.33 |
|                                                                                  | 56       |           |      |
| <i>Proton pump inhibitor</i>                                                     | (14.7)   | 15 (19.7) | 0.27 |
| <b>Number of vessels with obstructive (<math>\geq 50\%</math>) CAD - no. (%)</b> |          |           | 0.49 |
| <i>0</i>                                                                         | 86       |           |      |
|                                                                                  | (22.6)   | 13 (17.1) |      |
| <i>1</i>                                                                         | 157      |           |      |
|                                                                                  | (41.3)   | 36 (47.4) |      |
| <i>2</i>                                                                         | 137      |           |      |
|                                                                                  | (36.1)   | 27 (35.5) |      |
|                                                                                  | 235      |           | 0.01 |
| <b>Revascularized (PCI + CABG) - no. (%)</b>                                     | (61.8)   | 35 (46.1) | 1    |

BMI – body mass index; CAD – coronary artery disease; ACEi/ARB – angiotensin converting enzyme inhibitor/angiotensin ii receptor blocker.

**Supplemental Table 4.** Baseline characteristics by discovery and validation cohort

|                                                                                  | <b>Total<br/>(n=456)</b> | <b>Discovery<br/>(n=228)</b> | <b>Validation<br/>(n=228)</b> |
|----------------------------------------------------------------------------------|--------------------------|------------------------------|-------------------------------|
| <b>Age - mean (SD)</b>                                                           | 66.7 (11.3)              | 66.9 (11.4)                  | 66.5 (11.3)                   |
| <b>Sex (female) - no. (%)</b>                                                    | 124 (27.2)               | 60 (26.3)                    | 64 (28.1)                     |
| <b>Hypertension - no. (%)</b>                                                    | 302 (66.2)               | 157 (68.9)                   | 145 (63.6)                    |
| <b>Dyslipidemia - no. (%)</b>                                                    | 277 (60.8)               | 148 (64.9)                   | 129 (56.6)                    |
| <b>Diabetes - no. (%)</b>                                                        | 147 (32.2)               | 73 (32.3)                    | 74 (32.9)                     |
| <b>Smoking - no. (%)</b>                                                         |                          |                              |                               |
| <i>Never</i>                                                                     | 265 (58.1)               | 134 (58.8)                   | 131 (57.5)                    |
| <i>Remote (quit &gt;1 month ago)</i>                                             | 112 (24.6)               | 54 (23.7)                    | 58 (25.4)                     |
| <i>Active</i>                                                                    | 79 (17.3)                | 40 (17.5)                    | 39 (17.1)                     |
| <b>Family history of CAD - no. (%)</b>                                           | 65 (14.3)                | 32 (14.0)                    | 33 (14.5)                     |
| <b>Atrial fibrillation - no. (%)</b>                                             | 48 (10.5)                | 24 (10.5)                    | 24 (10.5)                     |
| <b>Indications for angiography - no. (%)</b>                                     |                          |                              |                               |
| <i>Acute coronary syndrome</i>                                                   | 203 (44.5)               | 96 (42.1)                    | 107 (46.9)                    |
| <i>Staged percutaneous coronary intervention</i>                                 | 42 (9.2)                 | 19 (8.3)                     | 23 (10.1)                     |
| <i>Stable coronary artery disease</i>                                            | 165 (36.2)               | 87 (38.2)                    | 78 (34.2)                     |
| <i>Shock</i>                                                                     | 1 (0.2)                  | 0 (0.0)                      | 1 (0.4)                       |
| <b>Previous history - no. (%)</b>                                                |                          |                              |                               |
| <i>Percutaneous coronary intervention</i>                                        | 118 (25.9)               | 57 (25.0)                    | 61 (26.8)                     |
| <i>Myocardial infarction</i>                                                     | 85 (18.6)                | 44 (19.3)                    | 41 (18.0)                     |
| <i>Coronary artery bypass grafting</i>                                           | 23 (5.0)                 | 10 (4.4)                     | 13 (5.7)                      |
| <i>Peripheral artery disease</i>                                                 | 36 (7.9)                 | 22 (9.7)                     | 14 (6.1)                      |
| <i>Cerebrovascular accident</i>                                                  | 27 (5.9)                 | 15 (6.6)                     | 12 (5.3)                      |
| <i>Bleed</i>                                                                     | 8 (1.8)                  | 3 (1.3)                      | 5 (2.2)                       |
| <i>Heart failure</i>                                                             | 23 (5.0)                 | 12 (5.3)                     | 11 (4.8)                      |
| <b>Medications - no. (%)</b>                                                     |                          |                              |                               |
| <i>Aspirin</i>                                                                   | 415 (91.0)               | 212 (93.0)                   | 203 (89.0)                    |
| <i>P2Y12 inhibitor</i>                                                           | 410 (89.9)               | 205 (89.9)                   | 205 (89.9)                    |
| <i>ACEi/ARB</i>                                                                  | 238 (52.2)               | 114 (50.0)                   | 124 (54.4)                    |
| <i>Beta blocker</i>                                                              | 268 (58.8)               | 136 (59.7)                   | 132 (57.9)                    |
| <i>Calcium channel blocker</i>                                                   | 63 (13.8)                | 30 (13.2)                    | 33 (14.5)                     |
| <i>Statin</i>                                                                    | 372 (81.6)               | 194 (85.1)                   | 178 (78.1)                    |
| <i>Proton pump inhibitor</i>                                                     | 71 (15.6)                | 41 (18.0)                    | 30 (13.2)                     |
| <b>Number of vessels with obstructive (<math>\geq 50\%</math>) CAD - no. (%)</b> |                          |                              |                               |
| 0                                                                                | 99 (21.7)                | 49 (21.5)                    | 50 (21.9)                     |
| 1                                                                                | 193 (42.3)               | 98 (43.0)                    | 95 (41.7)                     |
| 2                                                                                | 164 (36.0)               | 81 (35.5)                    | 83 (36.4)                     |
| <b>Revascularized (PCI + CABG) - no. (%)</b>                                     | 270 (59.2)               | 136 (59.7)                   | 134 (58.8)                    |

## **References**

1. Jung RG, Simard T, Di Santo P et al. Performance of plasminogen activator inhibitor-1 as a biomarker in patients undergoing coronary angiography: Analytical and biological considerations. *Diabetes and Vascular Disease Research* 2019;1479164119845123.
2. Jung RG, Simard T, Di Santo P et al. Evaluation of plasminogen activator inhibitor-1 as a biomarker of unplanned revascularization and major adverse cardiac events in coronary angiography and percutaneous coronary intervention. *Thrombosis Research* 2020.
3. Jung R, Radko S, Pelka P. The Dual Nature of Nek9 in Adenovirus Replication. *J Virol* 2016;90:1931-43.
4. Zeng Z, Xia L, Fan X et al. Platelet-derived miR-223 promotes a phenotypic switch in arterial injury repair. *The Journal of Clinical Investigation* 2019;129:1372-1386.
5. Al Ghaithi R, Mori J, Nagy Z et al. Evaluation of the Total Thrombus-Formation System (T-TAS): application to human and mouse blood analysis. *Platelets* 2019;30:893-900.
6. Ito M, Kaikita K, Sueta D et al. Total Thrombus-Formation Analysis System (T-TAS) Can Predict Periprocedural Bleeding Events in Patients Undergoing Catheter Ablation for Atrial Fibrillation. *Journal of the American Heart Association*;5:e002744.
7. Sueta D, Kaikita K, Okamoto N et al. A novel quantitative assessment of whole blood thrombogenicity in patients treated with a non-vitamin K oral anticoagulant. *Int J Cardiol* 2015;197:98-100.
8. Hosokawa K, Ohnishi T, Kondo T et al. A novel automated microchip flow-chamber system to quantitatively evaluate thrombus formation and antithrombotic agents under blood flow conditions. *J Thromb Haemost* 2011;9:2029-37.
9. Vajen T, Benedikter BJ, Heinzmann ACA et al. Platelet extracellular vesicles induce a pro-inflammatory smooth muscle cell phenotype. *Journal of Extracellular Vesicles* 2017;6:1322454.

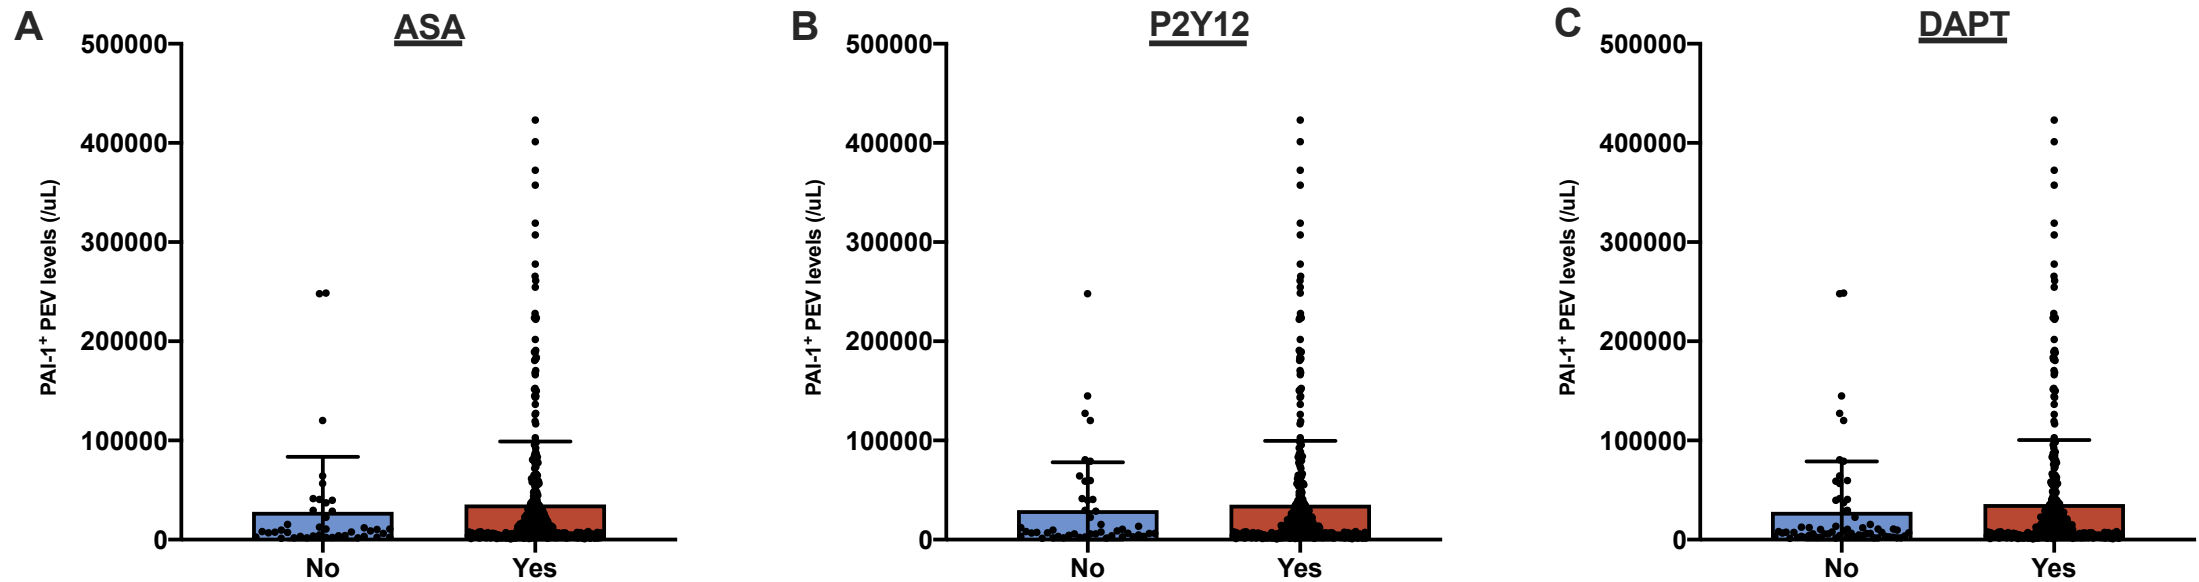

**Supplemental Figure 1.** PAI-1<sup>+</sup> PEV levels stratified by antiplatelet agent. **(A)** Aspirin (ASA) did not affect PAI-1<sup>+</sup> PEV levels. **(B)** P2Y12 inhibitor did not affect PAI-1<sup>+</sup> PEV levels. **(C)** Dual antiplatelet therapy (DAPT) did not affect PAI-1<sup>+</sup> PEV levels. No – refers to patients who are not on the respective antiplatelet therapy. Comparisons were done by Mann-Whitney U-test.

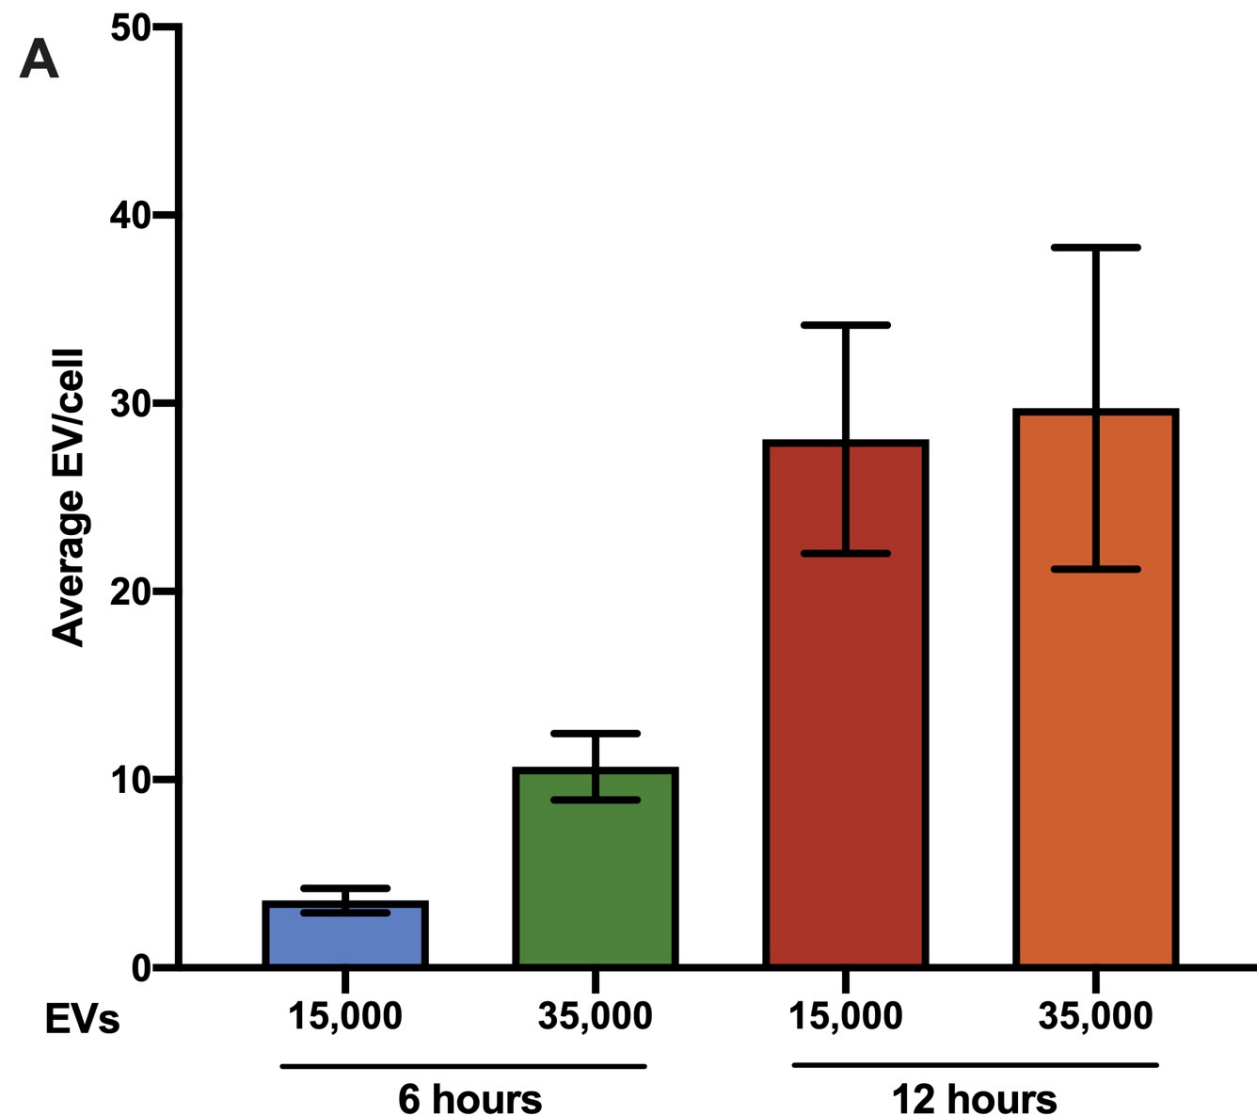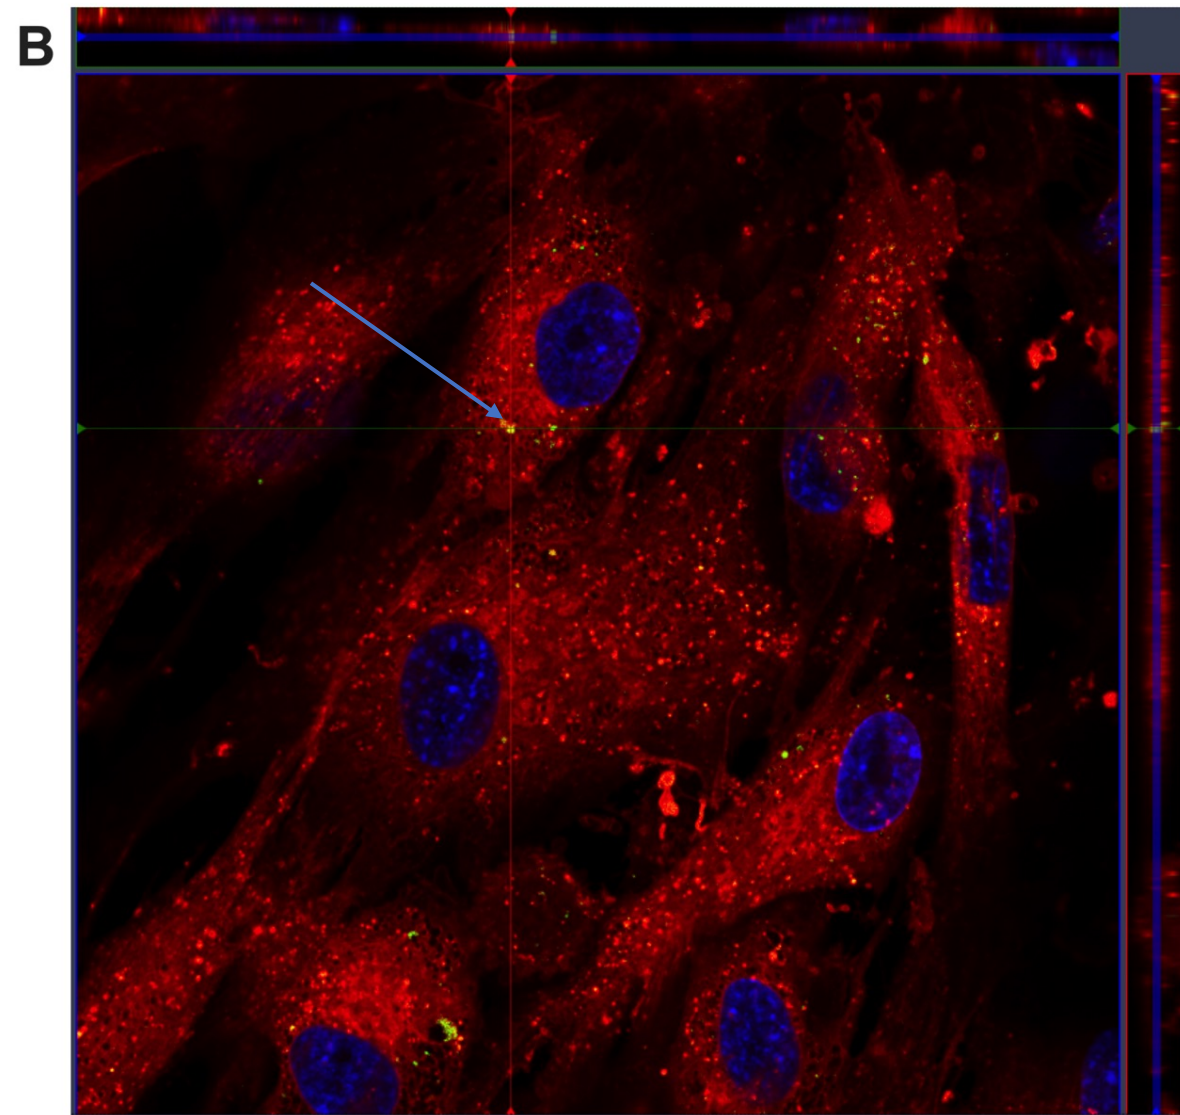

**Supplemental Figure 2.** Interaction between PEV and VSMCs. **(A)** Incubation with increasing concentrations of CMFDA<sup>+</sup> PEV with VSMCs assessed by flow cytometry reveals increased interaction in a dose- and time- dependent fashion. **(B)** Representative immunofluorescence image to evaluate PEV-VSMC interaction. PEV were stained using CellTracker Green (arrow), VSMC was stained in DAPI and CellMask Orange.



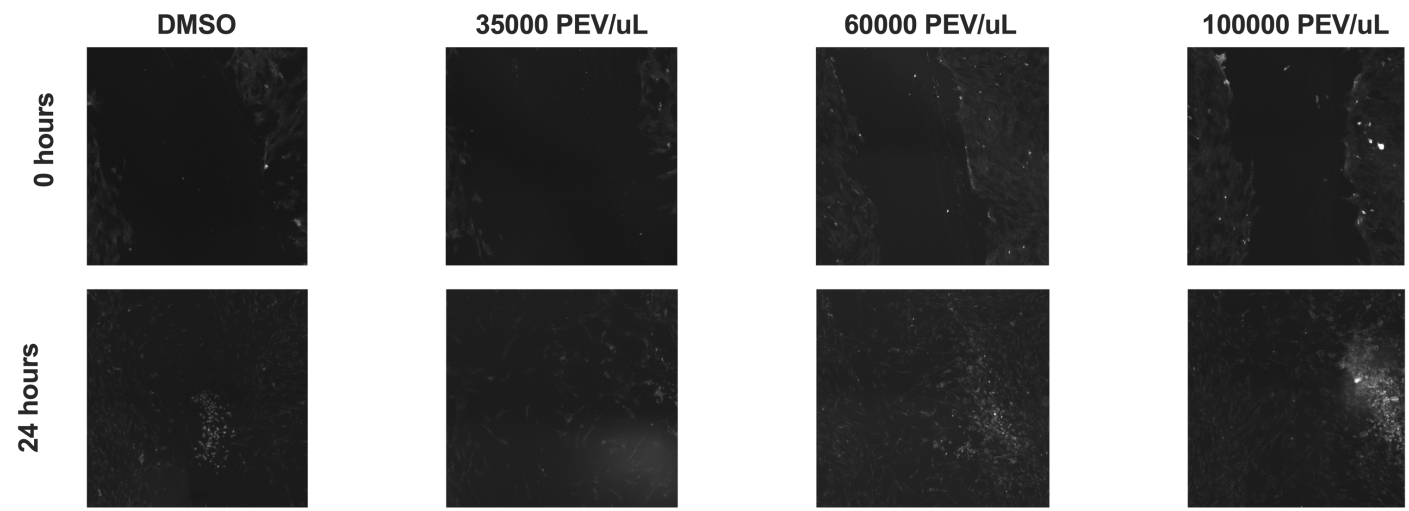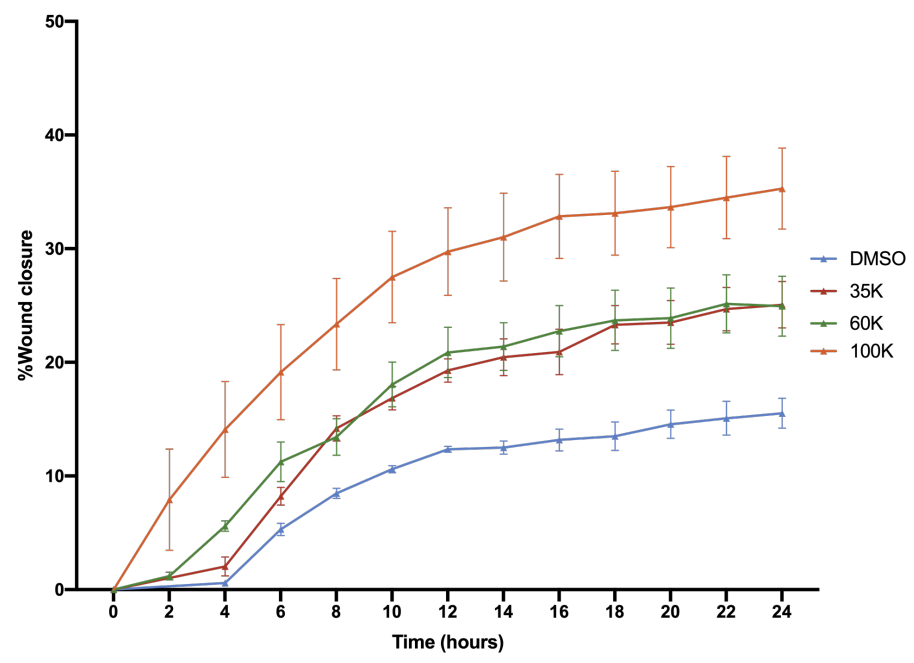

**Supplemental Figure 3.** Effect of PEV on VSMC migration by scratch assay. Increasing concentrations of PEV enhanced VSMC migration over 24 hours.

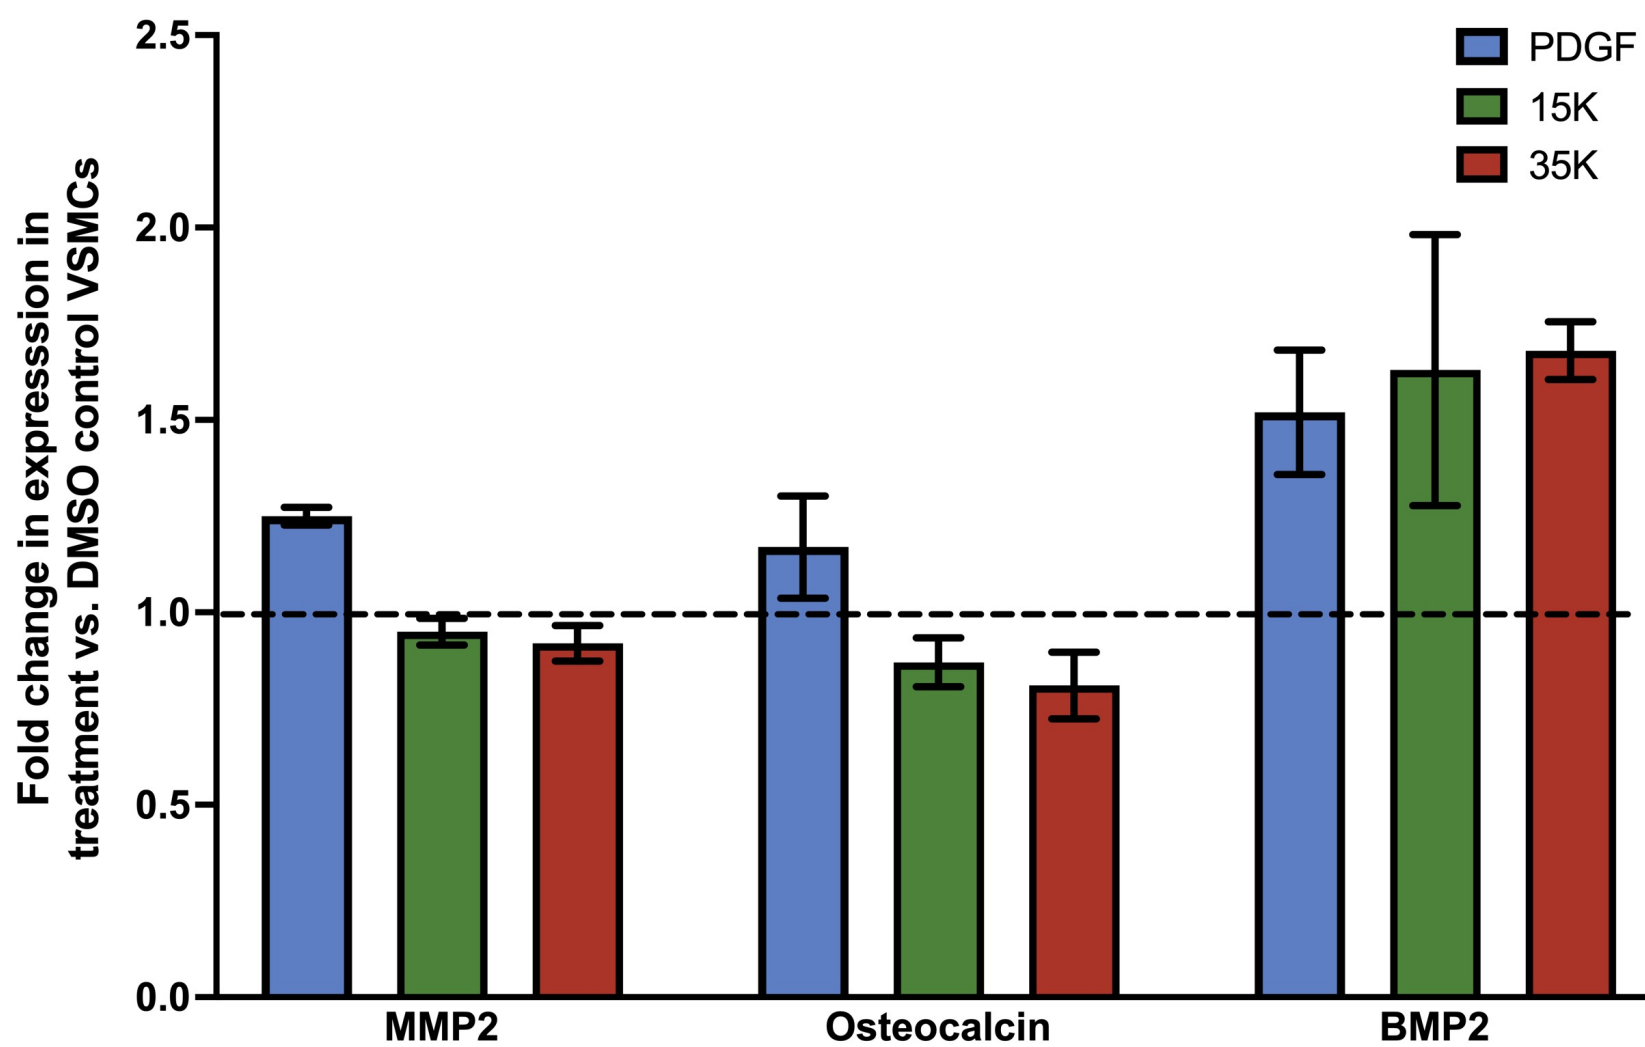

**Supplemental Figure 4.** Effect of PEV on osteogenic transcription factors. VSMC co-cultured with PEVs exhibited changes in osteogenic marker BMP-2, but not MMP2 or osteocalcin. 15K and 35K represent  $1.5 \times 10^4$  PEV/uL and  $3.5 \times 10^4$  PEV/uL.

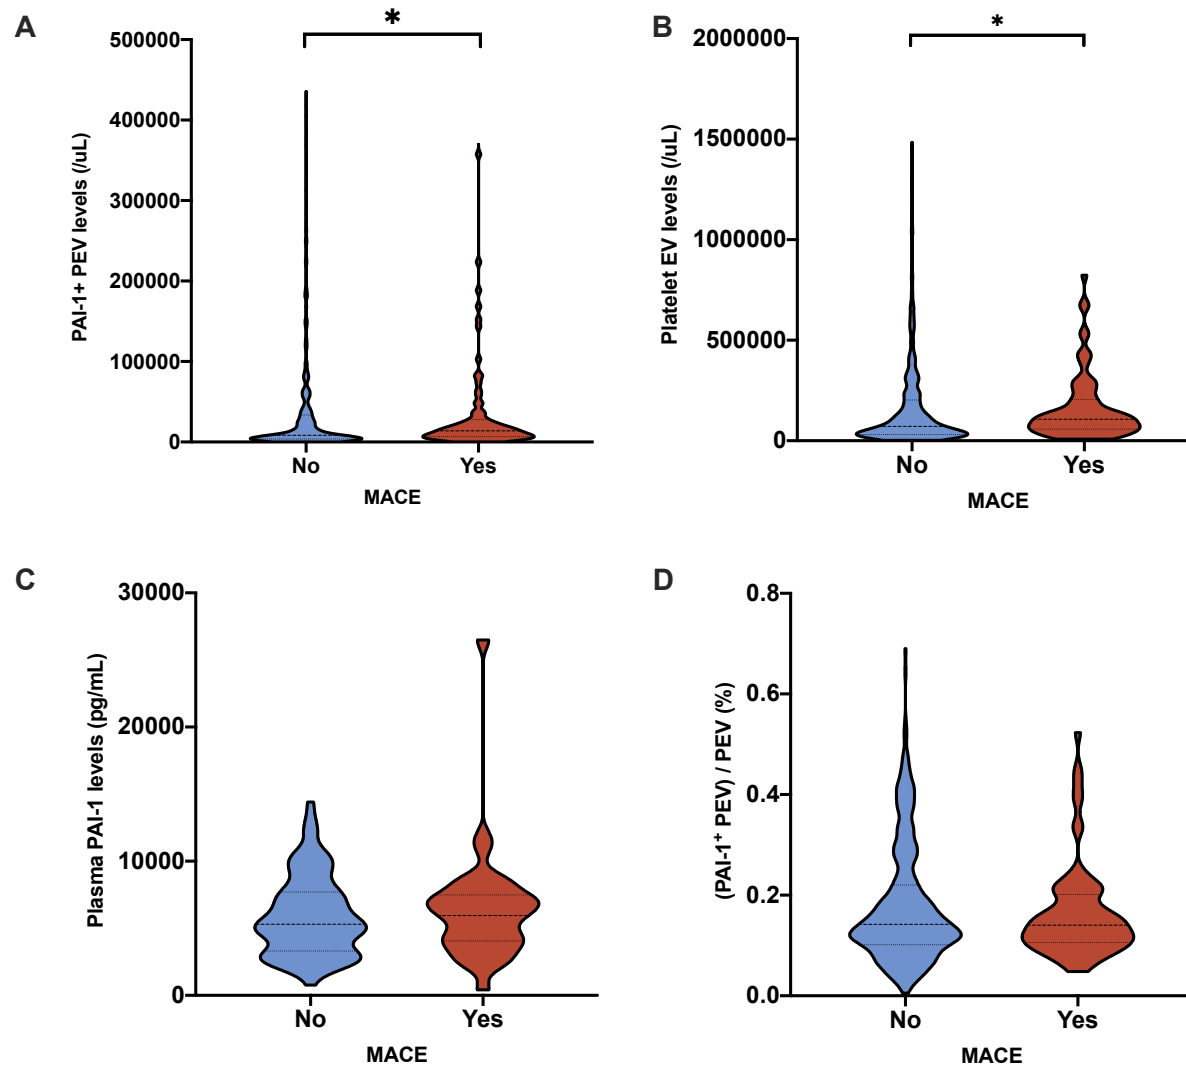

**Supplemental Figure 5.** Difference in PEV levels (/uL) stratified by MACE. **(A)** Median (Q1-Q3) PAI-1<sup>+</sup> PEV levels were significantly elevated in MACE (13786.6 [6711.7-26942.1] PAI-1<sup>+</sup> PEV/uL vs. 8344.9 [3777.2-33499.7] PAI-1<sup>+</sup> PEV/uL, n=76 and 380, respectively, p=0.047). **(B)** Median (Q1-Q3) PEV levels were elevated in MACE (107463.0 [58416.1-202987.8] PEV/uL vs. 71675.6 [31184.5-201313.3] PEV/uL, n=76 and 380, respectively, p=0.04). **(C)** No differences in plasma PAI-1 levels were observed when stratified by MACE. **(D)** No differences in PAI-1<sup>+</sup> PEV fraction was observed when stratified by MACE. Data are presented as violin graphs and compared by Mann-Whitney U-test. \*p<0.05.

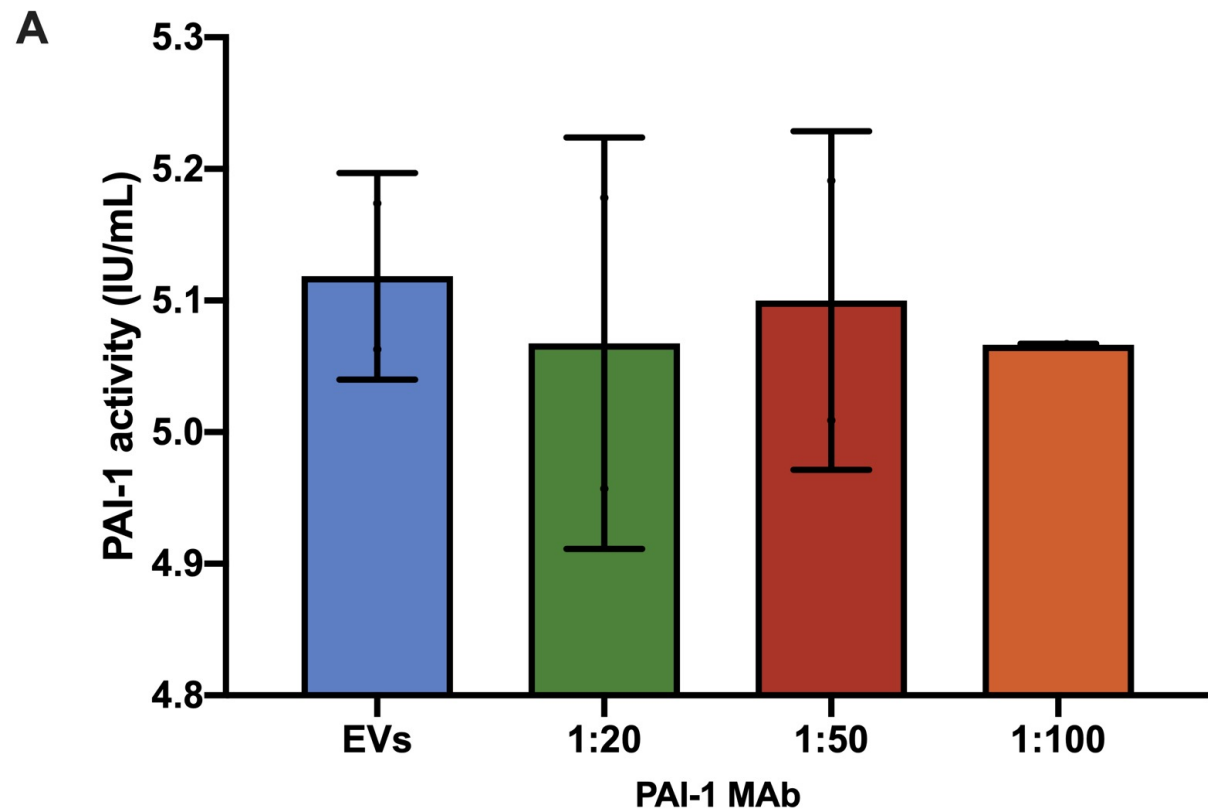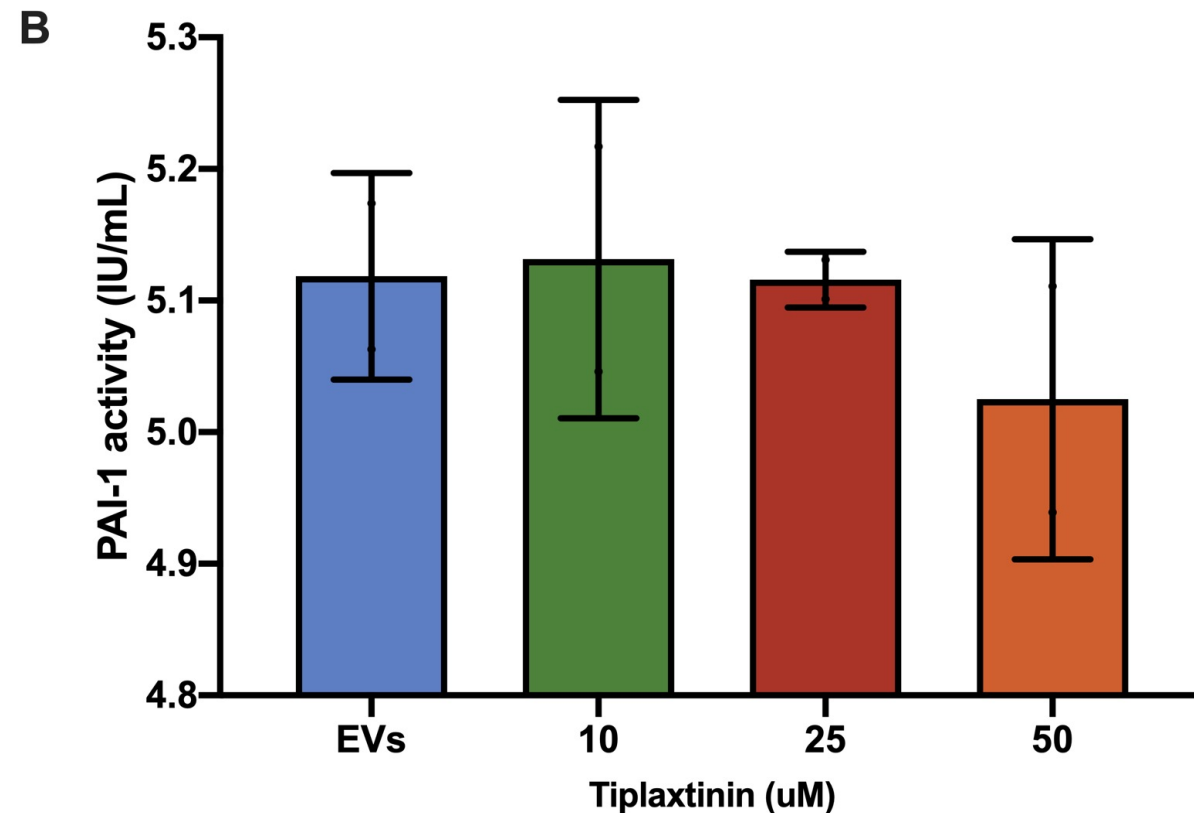

**Supplemental Figure 6.** PAI-1 activity of PAI-1<sup>+</sup> PEV complex in the presence of PAI-1 inhibition. **(A)** The addition of PAI-1 monoclonal antibody (MAb) had no effect on activity of PAI-1<sup>+</sup> PEV complex (IU/mL). **(B)** Increasing concentrations of tiplaxtinin had no effect on PAI-1<sup>+</sup> PEV complex activity.
